# Supplementary material
Source: PubMed Central journal article supplement (PMC9214955)
Supplement: sj-pdf-1-nho-10.1177_19418744221098384.pdf [file sj-pdf-1-nho-10.1177_19418744221098384.pdf]

**SUPPLEMENTAL MATERIAL**

**Resident-Driven Dysphagia Screening Protocol for Expedited Antithrombotic Delivery in Acute Ischemic Stroke**

**SUPPLEMENTAL TABLE 1. Demographic data stratified by pass/fail dysphagia assessment.**

|                                               | <b>Failed all dysphagia screens/evaluations (n=104)</b> | <b>Passed any dysphagia screen/evaluation (n=789)</b> | <b>p-value</b> |
|-----------------------------------------------|---------------------------------------------------------|-------------------------------------------------------|----------------|
| Age, median y (IQR)                           | 75 (67-83)                                              | 67 (58-76)                                            | <0.01          |
| Female, no. (%)                               | 42 (40%)                                                | 345 (44%)                                             | 0.52           |
| mRS prior to admission, median (IQR)          | 1 (0-3)                                                 | 0 (0-2)                                               | 0.12           |
| Race, no. (%)                                 |                                                         |                                                       | 0.50           |
| Caucasian                                     | 63/104 (61%)                                            | 420/788 (53%)                                         |                |
| Black                                         | 24/104 (23%)                                            | 227/788 (29%)                                         |                |
| Asian                                         | 1/104 (1%)                                              | 14/788 (2%)                                           |                |
| Other                                         | 16/104 (15%)                                            | 127/788 (16%)                                         |                |
| Hispanic, no. (%)                             | 11/100 (11%)                                            | 100/755 (13%)                                         | 0.53           |
| Past medical history, no. (%)                 |                                                         |                                                       |                |
| Hypertension                                  | 86/103 (84%)                                            | 667/787 (85%)                                         | 0.74           |
| Dyslipidemia                                  | 65/103 (63%)                                            | 503/788 (64%)                                         | 0.89           |
| Diabetes                                      | 36/103 (35%)                                            | 316/788 (40%)                                         | 0.32           |
| Prior stroke                                  | 32/103 (31%)                                            | 215/788 (27%)                                         | 0.42           |
| Atrial fibrillation                           | 35/103 (34%)                                            | 141/787 (18%)                                         | <0.01          |
| Coronary artery disease                       | 28/103 (27%)                                            | 175/788 (22%)                                         | 0.26           |
| Congestive heart failure                      | 21/103 (20%)                                            | 119/787 (15%)                                         | 0.17           |
| Baseline NIHSS, median (IQR)                  | 17 (11-23)                                              | 3 (1-7)                                               | <0.01          |
| Baseline NIHSS subscores, no. (%)             |                                                         |                                                       |                |
| ≥2 points for level of alertness              | 22 (21%)                                                | 25 (3%)                                               | <0.01          |
| ≥2 points for facial weakness                 | 46 (44%)                                                | 127 (16%)                                             | <0.01          |
| ≥1 point for dysarthria*                      | 89 (86%)                                                | 326 (41%)                                             | <0.01          |
| Anterior circulation only infarction, no. (%) | 72/101 (71%)                                            | 479/743 (64%)                                         | 0.18           |
| ASPECTS**, median (IQR)                       | 9 (7-9)                                                 | 9 (8-10)                                              | <0.01          |
| Occlusion of ICA, M1, or basilar, no. (%)     | 42 (40%)                                                | 104 (13%)                                             | <0.01          |

|                       |          |          |      |
|-----------------------|----------|----------|------|
| Thrombolysis, no. (%) | 17 (16%) | 79 (10%) | 0.05 |
|-----------------------|----------|----------|------|

SLP denotes speech and language pathology, RN registered nurse, IQR interquartile range, mRS Modified Rankin Score, NIHSS NIH Stroke Scale/Score, ASPECTS Alberta Stroke Program Early CT Score, and ICA internal carotid artery.

Patients who failed all dysphagia screens/evaluations were excluded from the primary analyses reported in this study.

**SUPPLEMENTAL TABLE 2. Patient characteristics according to dysphagia screen by physician.**

|                                               | <b>MD not screened<br/>(n=888)</b> | <b>MD screen (n=31)</b> | <b>p-value</b> |
|-----------------------------------------------|------------------------------------|-------------------------|----------------|
| Age, median y (IQR)                           | 68 (59-77)                         | 64 (54-77)              | 0.33           |
| Female, no. (%)                               | 389 (44%)                          | 12 (39%)                | 0.57           |
| mRS prior to admission, median (IQR)          | 0 (0-2)                            | 0 (0-2)                 | 0.62           |
| <i>Race, no. (%)</i>                          |                                    |                         | 0.81           |
| Caucasian                                     | 483/885 (55%)                      | 19/31 (61%)             |                |
| Black                                         | 249/885 (28%)                      | 8 (26%)                 |                |
| Asian                                         | 15 (2%)                            | 0 (0%)                  |                |
| Other                                         | 138 (16%)                          | 4 (13%)                 |                |
| Hispanic, no. (%)                             | 106/848 (13%)                      | 3/30 (10%)              | 0.58           |
| <i>Past medical history, no. (%)</i>          |                                    |                         |                |
| Hypertension                                  | 747/885 (84%)                      | 29/31 (94%)             | 0.16           |
| Dyslipidemia                                  | 561/886 (63%)                      | 20/31 (65%)             | 0.89           |
| Diabetes                                      | 349/886 (39%)                      | 14/31 (45%)             | 0.52           |
| Prior stroke                                  | 245/886 (28%)                      | 5/31 (16%)              | 0.16           |
| Atrial fibrillation                           | 179/885 (20%)                      | 5/31 (16%)              | 0.58           |
| Coronary artery disease                       | 201/886 (23%)                      | 6/31 (19%)              | 0.66           |
| Congestive heart failure                      | 142/885 (16%)                      | 8/31 (26%)              | 0.15           |
| Baseline NIHSS, median (IQR)                  | 4 (1-10)                           | 18 (4-25)               | <0.01          |
| <i>Baseline NIHSS subscores, no. (%)</i>      |                                    |                         |                |
| ≥2 points for level of alertness              | 53 (6%)                            | 6 (19%)                 | 0.01           |
| ≥2 points for facial weakness                 | 170 (19%)                          | 15 (48%)                | <0.01          |
| ≥1 point for dysarthria*                      | 419 (47%)                          | 22 (71%)                | <0.01          |
| Anterior circulation only infarction, no. (%) | 535/839 (64%)                      | 28/30 (93%)             | <0.01          |
| ASPECTS*, median (IQR)                        | 9 (8-10)                           | 9 (8-10)                | 0.87           |
| Occlusion of ICA, M1, or basilar, no. (%)     | 144 (16%)                          | 16 (52%)                | <0.01          |

|                       |          |         |      |
|-----------------------|----------|---------|------|
| Thrombolysis, no. (%) | 94 (11%) | 7 (23%) | 0.07 |
|-----------------------|----------|---------|------|

Patients without in-hospital stroke or time of dysphagia screen were compared according to whether the patients were screened by physician or nursing staff. Demographic and clinical information were missing for 15 of 903 patients (1.7%), and are reported for 888 patients. IQR denotes interquartile range, mRS Modified Rankin Score, NIHSS NIH Stroke Scale/Score, ASPECTS Alberta Stroke Program Early CT Score, and ICA internal carotid artery.

\*ASPECTS provided for patients with anterior circulation only infarctions.
